# Supplementary material for: TAK1 regulates caspase 8 activation and necroptotic signaling via multiple cell death checkpoints
Source: PubMed Central journal article supplement (PMC5059887; doi:10.1038/cddis.2016.294), 2016-09-29
Supplement: cddis2016294x1.pdf [file cddis2016294x1.pdf]

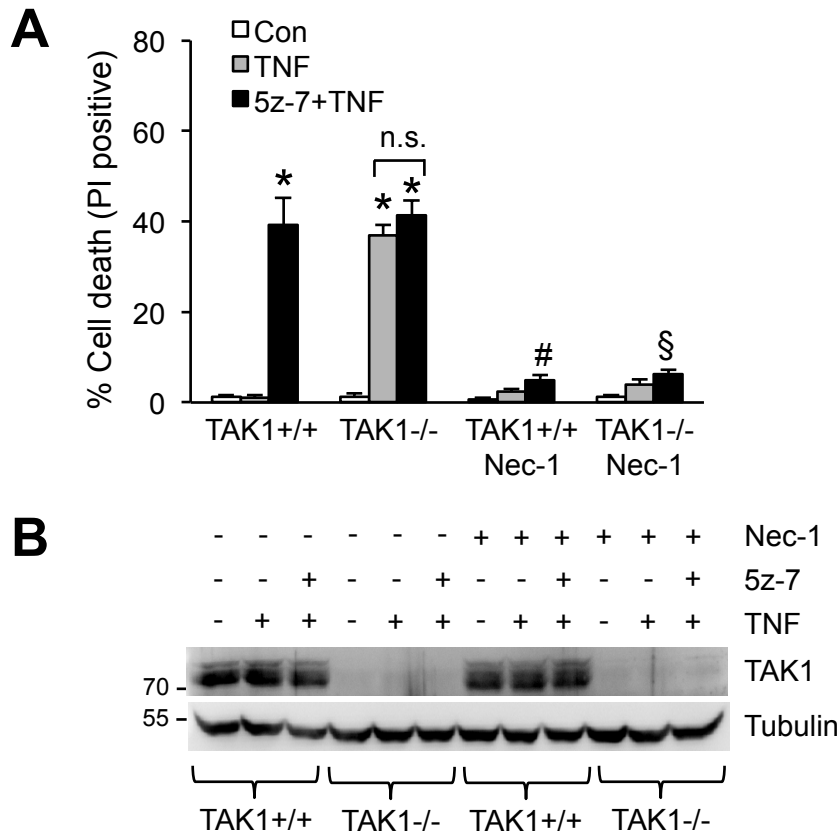

**Figure S1.** Inhibition of TAK1 with 5z-7 promotes TNF $\alpha$ -induced cell death. **A.** Cell death assessed by propidium iodide (PI) staining of TAK1+/+ and TAK1-/- MEFs treated with vehicle control, TNF $\alpha$ , or 5z-7 plus TNF $\alpha$ , with or without Nec-1. \* $P < 0.05$  vs Con; # $P < 0.05$  vs TAK1+/+ 5z-7+TNF; § $P < 0.05$  vs TAK1-/- 5z-7+TNF. n.s., non-significant. **B.** Western blots for the indicated proteins from TAK1+/+ and TAK1-/- MEFs.

**A**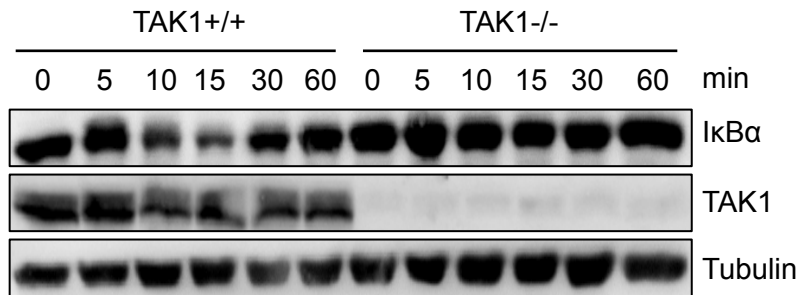**B**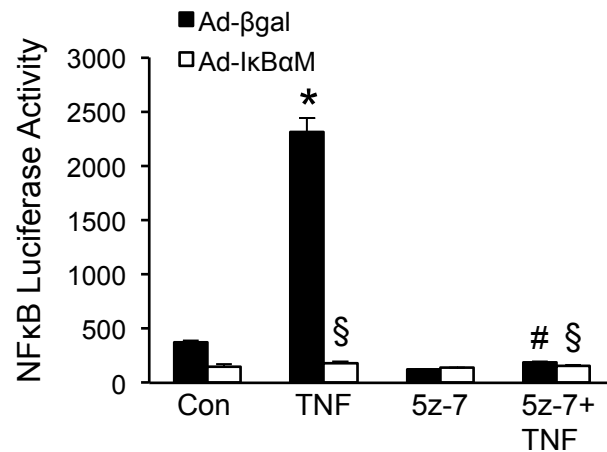

**Figure S2.** TAK1 is essential for TNF $\alpha$ -induced NFκB activation. **A.** Western blotting with the indicated antibodies from cellular extracts of TAK1<sup>+/+</sup> and TAK1<sup>-/-</sup> MEFs stimulated with 10 ng/ml TNF $\alpha$  for the indicated time periods. **B.** Relative NFκB-luciferase activity from H9c2 myocytes infected with Ad-βgal or Ad-IκBαM (IκBα S32/36A mutant) along with an adenovirus encoding the NFκB-luciferase reporter for 24 h, followed by treatment with vehicle control, TNF $\alpha$ , 5z-7, or 5z-7 plus TNF $\alpha$  for 12 h. \* $P$  < 0.01 vs Con; # $P$  < 0.05 vs TNF. § $P$  < 0.05 vs Ad-βgal TNF.

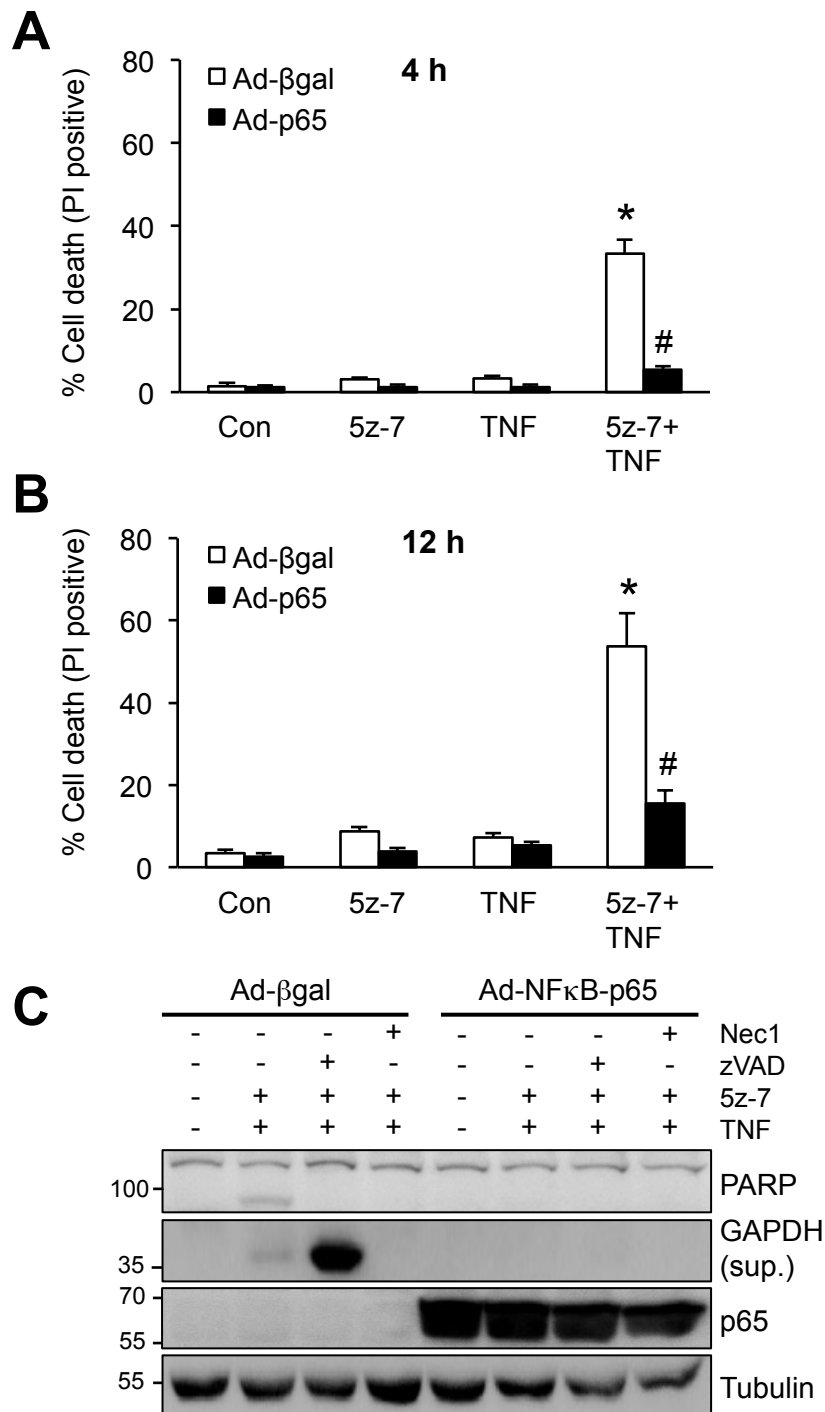

**Fig S3.** NFκB-p65 inhibits necroptotic cell death triggered by TAK1 inhibition. **A.** Quantification of cell death in H9c2 myocytes infected with β-gal or NFκB-p65 adenoviruses for 24 h, followed by stimulation with vehicle control, TNFα, 5z-7 for 4 h. \**P* < 0.05 vs Con. #*P* < 0.05 vs Ad-βgal 5z-7+TNF. **B.** Quantification of cell death in cells treated as in A for 12 h. \**P* < 0.05 vs Con; #*P* < 0.05 vs Ad-βgal 5z-7+TNF. **C.** Western blots for the indicated proteins from H9c2 myocytes infected with β-gal or NFκB-p65 adenoviruses for 24 h, followed by treatment with vehicle control or TNFα for 4 h, in the presence or absence of 5z-7 or Nec-1.

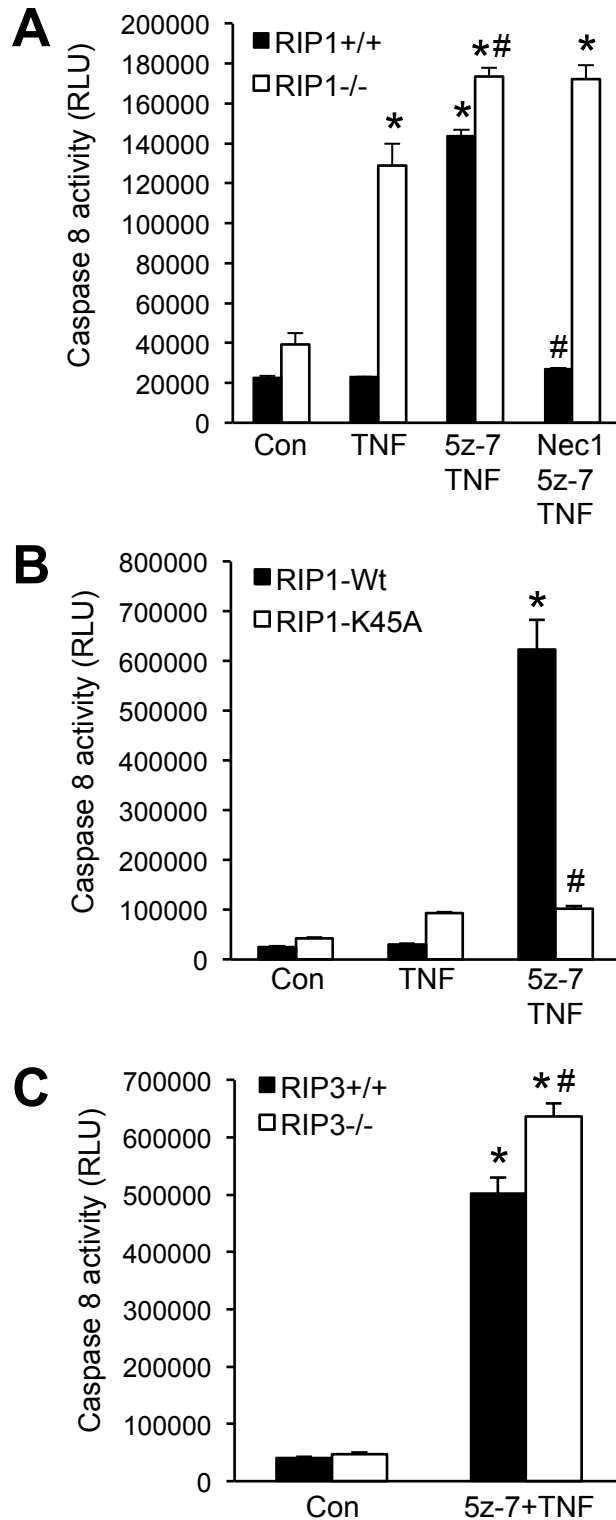

**Figure S4.** Role of RIP1 and RIP3 in TNF $\alpha$ -induced caspase 8 activity in the setting of TAK inhibition. **A.** Caspase 8 activity in RIP1<sup>+/+</sup> and RIP1<sup>-/-</sup> MEFs treated as indicated for 4 h. \* $P < 0.01$  vs Con; # $P < 0.05$  vs RIP1<sup>+/+</sup> 5z-7 plus TNF. **B.** Caspase 8 activity in RIP1<sup>-/-</sup> MEFs reconstituted with wild-type (Wt) or K45A mutant of RIP, treated as indicated for 4 h. \* $P < 0.05$  vs Con; # $P < 0.05$  vs RIP1-Wt. **C.** Caspase 8 activity in RIP3<sup>+/+</sup> and RIP3<sup>-/-</sup> MEFs treated with vehicle control or 5z-7 plus TNF $\alpha$  for 4 h. \* $P < 0.05$  vs Con; # $P < 0.05$  vs RIP3<sup>+/+</sup>.
